# Supplementary material for: Radiomics to predict outcomes and abscopal response of patients with cancer treated with immunotherapy combined with radiotherapy using a validated signature of CD8 cells
Source: PubMed Central journal article supplement (PMC7668366; doi:10.1136/jitc-2020-001429), 2020-11-13
Supplement: jitc-2020-001429supp001.pdf [file jitc-2020-001429supp001.pdf]

## Supplementary Tables

Table S1. Association of CD8 radiomics score and clinical outcomes

| PFS and CD8 radiomics score |                             | Variable         | n         | n         | Hazard      | lower       | upper       | P-value          | FDR          |
|-----------------------------|-----------------------------|------------------|-----------|-----------|-------------|-------------|-------------|------------------|--------------|
| Baseline values             |                             | Tested           |           | event     | Ratio       | CI          | CI          |                  |              |
| All lesions                 | Min                         | x>1.56           | 94        | 69        | 0.64        | 0.40        | 1.04        | 0.07*            | 0.10         |
|                             | <b>Min (extreme values)</b> | <b>xhigh</b>     | <b>48</b> | <b>35</b> | <b>0.34</b> | <b>0.17</b> | <b>0.68</b> | <b>0.0021***</b> | <b>0.011</b> |
|                             | Max                         | x>1.96           | 94        | 69        | 0.75        | 0.46        | 1.20        | 0.23             | 0.26         |
|                             | Mean                        | x>1.75           | 94        | 69        | 0.68        | 0.42        | 1.10        | 0.11             | 0.14         |
|                             | Standard deviation          | x>0.1            | 93        | 68        | 1.20        | 0.74        | 1.93        | 0.46             | 0.46         |
|                             | <b>Entropy</b>              | <b>x&gt;1.09</b> | <b>87</b> | <b>65</b> | <b>1.67</b> | <b>1.02</b> | <b>2.75</b> | <b>0.04**</b>    | <b>0.080</b> |
| Irradiated                  | Min                         | x>1.73           | 88        | 65        | 0.62        | 0.38        | 1.02        | 0.059*           | 0.10         |
|                             | <b>Min (extreme values)</b> | <b>xhigh</b>     | <b>44</b> | <b>32</b> | <b>0.37</b> | <b>0.18</b> | <b>0.76</b> | <b>0.0067***</b> | <b>0.022</b> |
| Non-irradiated              | <b>Min</b>                  | <b>x&gt;1.61</b> | <b>91</b> | <b>68</b> | <b>0.54</b> | <b>0.34</b> | <b>0.88</b> | <b>0.014**</b>   | <b>0.035</b> |
|                             | <b>Min (extreme values)</b> | <b>xhigh</b>     | <b>46</b> | <b>33</b> | <b>0.31</b> | <b>0.15</b> | <b>0.63</b> | <b>0.0011***</b> | <b>0.011</b> |

  

| OS and CD8 radiomics score |                             | Variable         | n         | n         | Hazard      | lower       | upper       | P-value        | FDR         |
|----------------------------|-----------------------------|------------------|-----------|-----------|-------------|-------------|-------------|----------------|-------------|
| Baseline values            |                             | Tested           |           | event     | Ratio       | CI          | CI          |                |             |
| All lesions                | Min                         | x>1.56           | 94        | 40        | 0.68        | 0.36        | 1.28        | 0.23           | 0.43        |
|                            | <b>Min (extreme values)</b> | <b>xhigh</b>     | <b>48</b> | <b>18</b> | <b>0.38</b> | <b>0.14</b> | <b>1.01</b> | <b>0.045**</b> | <b>0.17</b> |
|                            | Max                         | x>1.96           | 94        | 40        | 0.77        | 0.41        | 1.44        | 0.41           | 0.59        |
|                            | Mean                        | x>1.75           | 94        | 40        | 0.91        | 0.49        | 1.7         | 0.77           | 0.78        |
|                            | Standard deviation          | x>0.1            | 93        | 39        | 1.46        | 0.77        | 2.75        | 0.24           | 0.43        |
|                            | <b>Entropy</b>              | <b>x&gt;1.09</b> | <b>87</b> | <b>40</b> | <b>2.08</b> | <b>1.09</b> | <b>3.96</b> | <b>0.023**</b> | <b>0.17</b> |
| Irradiated                 | Min                         | x>1.73           | 88        | 39        | 0.87        | 0.47        | 1.64        | 0.68           | 0.78        |
|                            | <b>Min (extreme values)</b> | <b>xhigh</b>     | <b>44</b> | <b>18</b> | <b>0.88</b> | <b>0.35</b> | <b>2.22</b> | <b>0.78</b>    | <b>0.78</b> |
| Non-irradiated             | Min                         | x>1.61           | 91        | 39        | 0.69        | 0.36        | 1.32        | 0.26           | 0.43        |
|                            | <b>Min (extreme values)</b> | <b>xhigh</b>     | <b>46</b> | <b>19</b> | <b>0.39</b> | <b>0.15</b> | <b>1.05</b> | <b>0.052*</b>  | <b>0.17</b> |

Table S2 OS univariate analysis

|                                                         | Variable tested            | n         | n events  | Hazard Ratio<br>[95% CI] | p             |
|---------------------------------------------------------|----------------------------|-----------|-----------|--------------------------|---------------|
| Cohort                                                  | Erlangen                   | 94        | 40        | 0.57 [0.17; 1.95]        | 0.37          |
| (ref=Gustave Roussy)                                    | Ghent                      | 94        | 40        | 0.64 [0.33; 1.22]        | 0.17          |
| Age                                                     | >60.38                     | 94        | 40        | 1.15 [0.62; 2.15]        | 0.66          |
| Sex                                                     | M                          | 94        | 40        | 0.85 [0.44; 1.64]        | 0.63          |
| <b>Performance status</b>                               | <b>PS 1-2</b>              | <b>78</b> | <b>37</b> | <b>2.65 [1.33; 5.29]</b> | <b>0.0082</b> |
| Histology                                               | HNSCC                      | 94        | 40        | 2 [0.43; 9.38]           | 0.38          |
| (ref=colorectal cancer)                                 | melanoma                   | 94        | 40        | 0.64 [0.28; 1.44]        | 0.28          |
|                                                         | NSCLC                      | 94        | 40        | 0.15 [0.02; 1.16]        | 0.069         |
|                                                         | TCC                        | 94        | 40        | 1.12 [0.43; 2.92]        | 0.81          |
|                                                         | unknown primary            | 94        | 40        | 0.49 [0.06; 3.92]        | 0.50          |
| N of previous lines                                     | >1                         | 54        | 28        | 1.17 [0.44; 3.12]        | 0.76          |
| N of IO cycles                                          | >4                         | 93        | 40        | 0.54 [0.28; 1.04]        | 0.059         |
| <b>IO-RT interval</b>                                   | <b>RT &gt;d14 after IO</b> | <b>94</b> | <b>40</b> | <b>2.67 [1.18; 6.07]</b> | <b>0.010</b>  |
| RT n of fractions                                       | >3                         | 94        | 40        | 0.48 [0.12; 2.03]        | 0.27          |
| RT dose per fraction                                    | >8                         | 94        | 40        | 1.54 [0.82; 2.91]        | 0.19          |
| RT total dose EQD2                                      | >36                        | 94        | 40        | 1.12 [0.59; 2.12]        | 0.72          |
| N of organs involved                                    | >or= 3                     | 94        | 40        | 1.14 [0.6; 2.18]         | 0.69          |
| Involved: Node                                          | Yes                        | 94        | 40        | 1.51 [0.74; 3.09]        | 0.24          |
| Involved: Brain                                         | Yes                        | 94        | 40        | 1.56 [0.37; 6.51]        | 0.57          |
| Involved: Liver                                         | Yes                        | 94        | 40        | 1.6 [0.83; 3.09]         | 0.17          |
| Involved: Head&neck                                     | Yes                        | 94        | 40        | 8.09 [1.87; 35.12]       | 0.031         |
| Involved: Bone                                          | Yes                        | 94        | 40        | 0.53 [0.13; 2.22]        | 0.34          |
| Involved: Sub cutaneous                                 | Yes                        | 94        | 40        | 0.63 [0.31; 1.3]         | 0.20          |
| Involved: Other                                         | Yes                        | 94        | 40        | 2.11 [1.11; 3.99]        | 0.027         |
| Involved: Lung                                          | Yes                        | 94        | 40        | 1.19 [0.63; 2.23]        | 0.59          |
| Involved: Adrenal gland                                 | Yes                        | 94        | 40        | 0.94 [0.13; 6.85]        | 0.95          |
| Irradiated: node                                        | Yes                        | 94        | 40        | 1.3 [0.69; 2.44]         | 0.42          |
| Irradiated: Brain                                       | Yes                        | 94        | 40        | 1.9 [0.26; 14.02]        | 0.57          |
| Irradiated: Liver                                       | Yes                        | 94        | 40        | 1.15 [0.45; 2.96]        | 0.77          |
| Irradiated: Head&neck                                   | Yes                        | 94        | 40        | 57 [5.04; 644.6]         | 0.017         |
| Irradiated: Bone                                        | Yes                        | 94        | 40        | NC                       | 0.13          |
| Irradiated: Sub cutaneous                               | Yes                        | 94        | 40        | 0.85 [0.39; 1.86]        | 0.68          |
| Irradiated: Other                                       | Yes                        | 94        | 40        | 2.13 [0.29; 15.69]       | 0.51          |
| Irradiated: Lung                                        | Yes                        | 94        | 40        | 0.71 [0.33; 1.55]        | 0.38          |
| PD-L1 (tumor cells)                                     | >5%                        | 40        | 10        | 0.84 [0.24; 3]           | 0.79          |
| PD-L1 (immune cells)                                    | >5%                        | 39        | 10        | 1.11 [0.31; 3.93]        | 0.87          |
| Absolute neutrophil count                               | >7.5 G/l                   | 85        | 39        | 2.36 [1.15; 4.84]        | 0.028         |
| Absolute lymphocyte count                               | <1 G/l                     | 85        | 39        | 2.26 [1.11; 4.62]        | 0.035         |
| <b>LDH</b>                                              | <b>&gt;250</b>             | <b>86</b> | <b>39</b> | <b>2.48 [1.3; 4.73]</b>  | <b>0.0074</b> |
| Albumin                                                 | <35                        | 64        | 30        | 2.85 [1.08; 7.52]        | 0.060         |
| <b>CRP</b>                                              | <b>&gt;10 mg/l</b>         | <b>90</b> | <b>38</b> | <b>2.74 [1.4; 5.35]</b>  | <b>0.0039</b> |
| NLR                                                     | >6                         | 85        | 39        | 1.2 [0.55; 2.62]         | 0.66          |
| RMH                                                     | RMH > 0                    | 58        | 29        | 1.55 [0.73; 3.32]        | 0.25          |
| GRim                                                    | High                       | 55        | 28        | 1.47 [0.69; 3.12]        | 0.32          |
| <b>RS CD8 T cells: entropy across all lesions</b>       | <b>&gt;1.09</b>            | <b>87</b> | <b>40</b> | <b>2.08 [1.09; 3.96]</b> | <b>0.023</b>  |
| RS CD8 T cells: minimal value of non-irradiated lesions | >1.61                      | 91        | 39        | 0.69 [0.36; 1.32]        | 0.26          |
|                                                         | High (>Q3)                 | 46        | 19        | 0.39 [0.15; 1.05]        | 0.052         |

IO: immuno-oncology; RT: radiotherapy; EQD2: equivalent dose in 2-Gy fraction; LDH: lactate dehydrogenase; CRP: C-reactive protein; NLR: neutrophil to lymphocyte ratio; RMH: Royal Marsden Hospital score; Grim: Gustave Roussy immune-score; RS: radiomics score.

Table S3 PFS univariate analysis

|                                                         | <b>Variable tested</b>     | <b>n</b>  | <b>n events</b> | <b>Hazard Ratio [95% CI]</b> | <b>p</b>        |
|---------------------------------------------------------|----------------------------|-----------|-----------------|------------------------------|-----------------|
| Cohort                                                  | Erlangen                   | 94        | 69              | 0.47 [0.22; 0.98]            | <b>0.044</b>    |
| (ref=Gustave Roussy)                                    | Ghent                      | 94        | 69              | 0.55 [0.33; 0.91]            | <b>0.021</b>    |
| Age                                                     | >60.38                     | 94        | 69              | 0.95 [0.6; 1.53]             | 0.85            |
| Sex                                                     | M                          | 94        | 69              | 0.84 [0.5; 1.42]             | 0.52            |
| <b>Performance status</b>                               | <b>PS 1-2</b>              | <b>78</b> | <b>60</b>       | 5.66 [3.18; 10.08]           | <b>1.90E-08</b> |
| Histology                                               | HNSCC                      | 94        | 69              | 0.91 [0.3; 2.72]             | 0.86            |
| (ref=colorectal cancer)                                 | melanoma                   | 94        | 69              | 0.39 [0.21; 0.71]            | <b>0.002</b>    |
|                                                         | NSCLC                      | 94        | 69              | 0.3 [0.13; 0.7]              | <b>0.0052</b>   |
|                                                         | TCC                        | 94        | 69              | 0.45 [0.21; 0.97]            | <b>0.042</b>    |
|                                                         | unknown primary            | 94        | 69              | 0.26 [0.04; 1.99]            | 0.20            |
| N of previous lines                                     | >1                         | 54        | 39              | 0.91 [0.38; 2.17]            | 0.82            |
| N of IO cycles                                          | >4                         | <b>94</b> | <b>69</b>       | 0.43 [0.26; 0.7]             | <b>0.00062</b>  |
| <b>IO-RT interval</b>                                   | <b>RT &gt;d14 after IO</b> | <b>93</b> | <b>69</b>       | 2.13 [1.24; 3.66]            | <b>3.90E-03</b> |
| RT n of fractions                                       | >3                         | 94        | 69              | 0.55 [0.25; 1.2]             | 0.11            |
| RT dose per fraction                                    | >8                         | 94        | 69              | 2.83 [1.74; 4.62]            | <b>5.40E-05</b> |
| RT total dose EQD2                                      | >36                        | 94        | 69              | 1.79 [1.11; 2.9]             | <b>0.017</b>    |
| N of organs involved                                    | <b>&gt;or= 3</b>           | 94        | 69              | 1.23 [0.77; 1.99]            | 0.39            |
| Involved: Node                                          | Yes                        | 94        | 69              | 0.98 [0.58; 1.65]            | 0.94            |
| Involved: Brain                                         | Yes                        | 94        | 69              | 1.75 [0.7; 4.41]             | 0.27            |
| Involved: Liver                                         | Yes                        | 94        | 69              | 2.65 [1.63; 4.33]            | <b>0.00019</b>  |
| Involved: Head&neck                                     | Yes                        | 94        | 69              | 2.59 [0.63; 10.7]            | 0.25            |
| Involved: Bone                                          | Yes                        | 94        | 69              | 1.1 [0.53; 2.31]             | 0.80            |
| Involved: Sub cutaneous                                 | Yes                        | 94        | 69              | 0.79 [0.46; 1.35]            | 0.38            |
| Involved: Other                                         | Yes                        | 94        | 69              | 0.93 [0.55; 1.57]            | 0.79            |
| Involved: Lung                                          | Yes                        | 94        | 69              | 1.28 [0.79; 2.06]            | 0.31            |
| Involved: Adrenal gland                                 | Yes                        | 94        | 69              | 1.03 [0.32; 3.27]            | 0.97            |
| Irradiated: node                                        | Yes                        | 94        | 69              | 0.78 [0.47; 1.28]            | 0.31            |
| Irradiated: Brain                                       | Yes                        | 94        | 69              | 1.81 [0.56; 5.8]             | 0.36            |
| Irradiated: Liver                                       | Yes                        | 94        | 69              | 2.49 [1.32; 4.67]            | <b>0.010</b>    |
| Irradiated: Head&neck                                   | Yes                        | 94        | 69              | 11.12 [1.39; 88.89]          | 0.089           |
| Irradiated: Bone                                        | Yes                        | 94        | 69              | 0.29 [0.04; 2.08]            | 0.13            |
| Irradiated: Sub cutaneous                               | Yes                        | 94        | 69              | 0.96 [0.51; 1.8]             | 0.91            |
| Irradiated: Other                                       | Yes                        | 94        | 69              | 1.41 [0.34; 5.78]            | 0.65            |
| Irradiated: Lung                                        | Yes                        | 94        | 69              | 0.75 [0.42; 1.34]            | 0.32            |
| PD-L1 (tumor cells)                                     | >5%                        | 40        | 21              | 0.52 [0.21; 1.25]            | 0.14            |
| PD-L1 (immune cells)                                    | >5%                        | 39        | 21              | 0.57 [0.23; 1.42]            | 0.21            |
| Absolute neutrophil count                               | >7.5 G/l                   | 85        | 63              | 1.2 [0.66; 2.18]             | 0.57            |
| Absolute lymphocyte count                               | <1 G/l                     | 85        | 63              | 1.31 [0.74; 2.32]            | 0.36            |
| <b>LDH</b>                                              | <b>&gt;250</b>             | <b>86</b> | <b>66</b>       | 2.15 [1.3; 3.55]             | <b>0.0041</b>   |
| Albumin                                                 | <35                        | 64        | 51              | 2.03 [0.86; 4.83]            | 0.14            |
| <b>CRP</b>                                              | <b>&gt;10 mg/l</b>         | <b>90</b> | <b>66</b>       | 1.77 [1.07; 2.92]            | <b>0.028</b>    |
| NLR                                                     | >6                         | 85        | 63              | 1.61 [0.9; 2.85]             | 0.12            |
| <b>RMH</b>                                              | RMH > 0                    | 58        | 48              | 2.31 [1.25; 4.28]            | <b>0.0055</b>   |
| <b>GRim</b>                                             | High                       | 55        | 45              | 3.29 [1.74; 6.21]            | <b>0.00018</b>  |
| <b>RS CD8 T cells: entropy across all lesions</b>       | <b>&gt;1.09</b>            | <b>87</b> | <b>65</b>       | 1.67 [1.02; 2.75]            | <b>0.040</b>    |
| RS CD8 T cells: minimal value of non-irradiated lesions | >1.61                      | 91        | 68              | 0.54 [0.34; 0.88]            | <b>0.014</b>    |
|                                                         | High (>Q3)                 | 46        | 33              | 3.27 [1.58; 6.77]            | <b>0.0011</b>   |

IO: immuno-oncology; RT: radiotherapy; EQD2: equivalent dose in 2-Gy fraction; LDH: lactate dehydrogenase; CRP: C-reactive protein; NLR: neutrophil to lymphocyte ratio; RMH: Royal Marsden Hospital score; Grim: Gustave Roussy immune-score; RS: radiomics score.

Table S4. Multivariate analysis of OS and PFS

| <b>OS</b>                                  | <b>Variable tested</b> | <b>Hazard Ratio [95% CI]</b> | <b>p</b> |
|--------------------------------------------|------------------------|------------------------------|----------|
| Performance status                         | PS 1-2                 | 1.57 [0.72; 3.45]            | 0.26     |
| IO-RT interval                             | >d14                   | 2.38 [0.68; 8.37]            | 0.18     |
| LDH                                        | >250                   | 2.07 [0.99; 4.31]            | 0.052    |
| CRP                                        | >10 mg/l               | 3.34 [1.48; 7.52]            | 0.0036   |
| RS CD8 T cells: entropy across all lesions | >1.09                  | 2.64 [1.21; 5.75]            | 0.015    |

  

| <b>PFS</b>                                 | <b>Variable tested</b> | <b>Hazard Ratio [95% CI]</b> | <b>p</b> |
|--------------------------------------------|------------------------|------------------------------|----------|
| Performance status                         | PS 1-2                 | 4.6 [2.28; 9.28]             | 0.000021 |
| IO-RT interval                             | >d14                   | 1.82 [0.86; 3.85]            | 0.12     |
| LDH                                        | >250                   | 1.82 [0.99; 3.34]            | 0.054    |
| CRP                                        | >10 mg/l               | 1.16 [0.61; 2.21]            | 0.65     |
| RS CD8 T cells: entropy across all lesions | >1.09                  | 1.23 [0.68; 2.21]            | 0.49     |

IO: immuno-oncology; RT: radiotherapy; LDH: Lactate dehydrogenase; CRP: C-reactive protein; NLR: neutrophil to lymphocyte ratio; RS: radiomics score.

Table S5. Multivariate analysis of OS and PFS including the centre of inclusion.

| <b>OS</b>                                  | <b>Variable tested</b> | <b>Hazard Ratio [95% CI]</b> | <b>p</b> |
|--------------------------------------------|------------------------|------------------------------|----------|
| Performance status                         | PS 1-2                 | 1.70 [0.76; 3.81]            | 0.20     |
| IO-RT interval                             | >d14                   | 2.86 [0.77; 10.60]           | 0.12     |
| LDH                                        | >250                   | 2.11 [1.03; 4.33]            | 0.004    |
| CRP                                        | >10 mg/l               | 3.54 [1.55; 8.06]            | 0.0026   |
| RS CD8 T cells: entropy across all lesions | >1.09                  | 2.59 [1.19; 5.62]            | 0.016    |
| Centre:Erlangen                            | Ref :Gustave Russy     | NC                           | NC       |
| Centre:Ghent                               |                        | 1.42 [0.64; 3.16]            | 0.38     |

  

| <b>PFS</b>                                 | <b>Variable tested</b> | <b>Hazard Ratio [95% CI]</b> | <b>p</b> |
|--------------------------------------------|------------------------|------------------------------|----------|
| Performance status                         | PS 1-2                 | 4.59 [2.27; 9.31]            | 0.000023 |
| IO-RT interval                             | >d14                   | 1.81 [0.77; 4.25]            | 0.18     |
| LDH                                        | >250                   | 1.82 [0.99; 3.35]            | 0.054    |
| CRP                                        | >10 mg/l               | 1.16 [0.60; 2.24]            | 0.67     |
| RS CD8 T cells: entropy across all lesions | >1.09                  | 1.23 [0.68; 2.22]            | 0.49     |
| Centre:Erlangen                            | Ref :Gustave Russy     | NC                           | NC       |
| Centre:Ghent                               |                        | 0.99 [0.51; 1.94]            | 0.98     |

IO: immuno-oncology; RT: radiotherapy; LDH: Lactate dehydrogenase; CRP: C-reactive protein; NLR: neutrophil to lymphocyte ratio; RS: radiomics score. NC: not computable

## Supplementary Figures

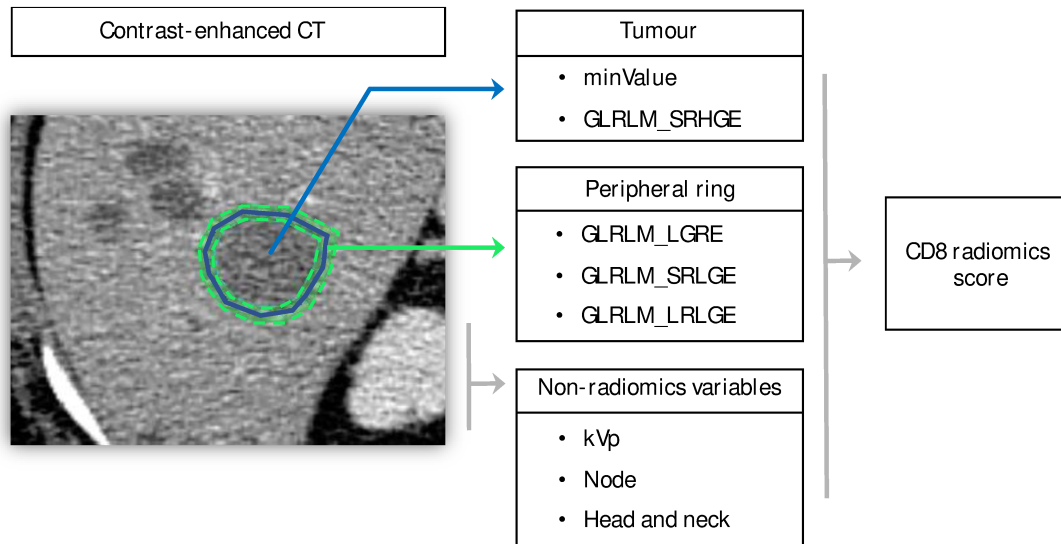

**Figure S1.** Description of the volumes of interest used to compute the radiomic score. Two volumes of interest (VOIs) were segmented for each lesion: (1) the lesion itself and (2) a peripheral ring (2mm on both sides of the tumor). The CD8 radiomics score integrated two radiomics features from the tumour, three radiomics features from the peripheral ring, and two non-radiomics features: the kilovoltage peak (kVp) and the location of the volume (node, or head and neck).

*minValue*: minimal value; *GLRLM*: Gray-Level Run Length Matrix; *SRHGE*: short-run high gray-level emphasis; *LGRE*: low gray-level run emphasis; *SRLGE*: short-run low gray-level emphasis; *LRLGE*: long-run low gray-level emphasis.

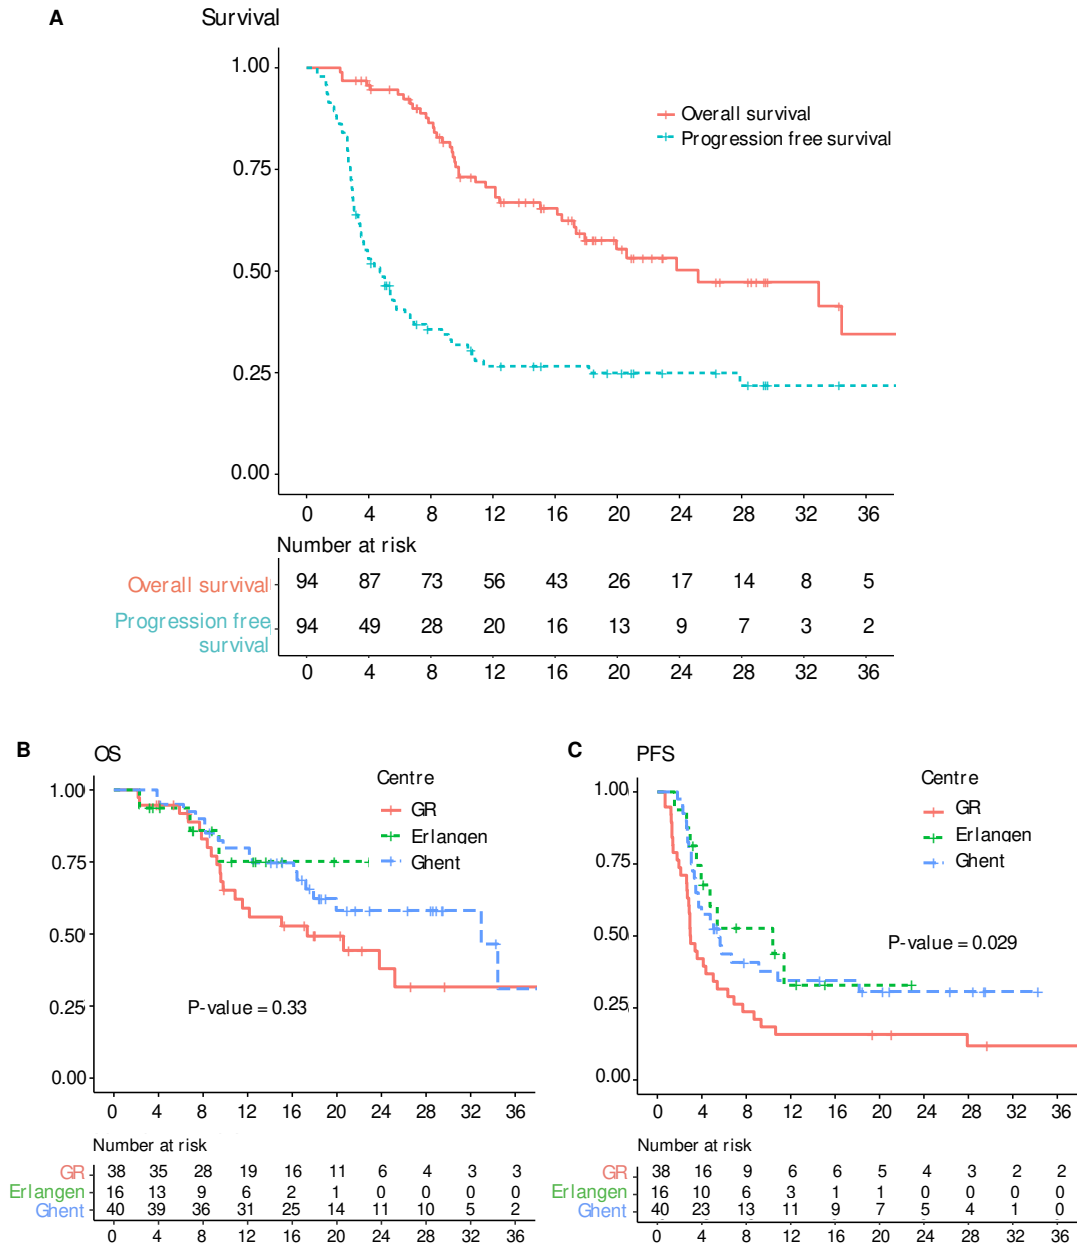

**Figure S2.** Kaplan-Meier curves of overall and progression-free survival of the whole cohort (A). B and C: Overall survival and progression-free survival curves by centre.

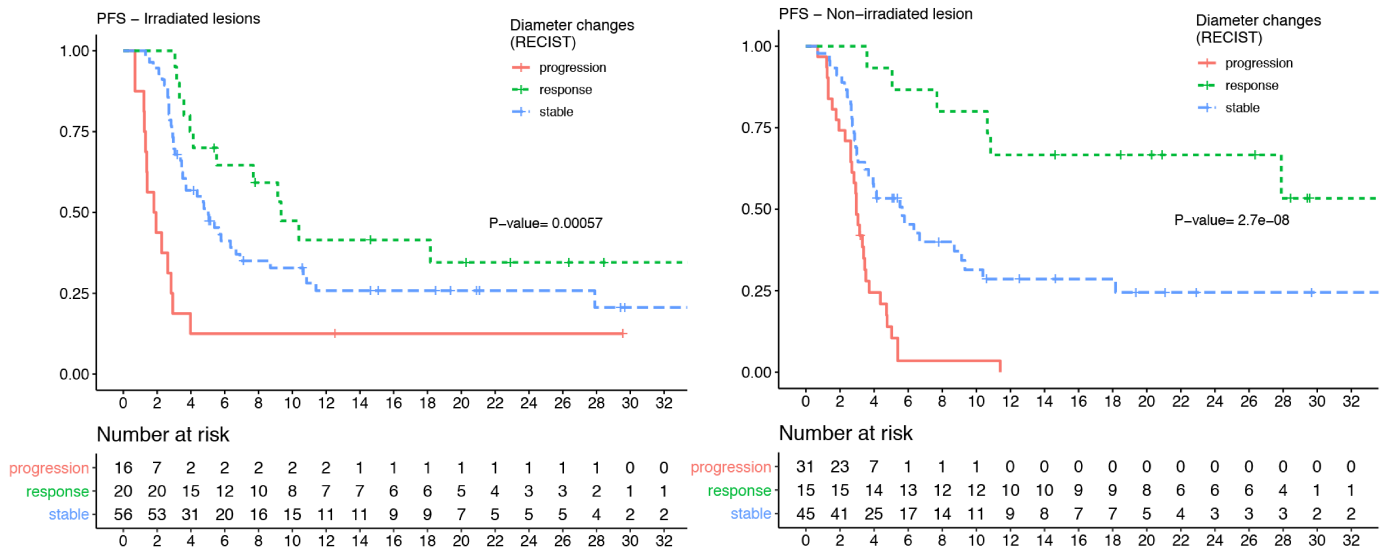

**Figure S3.** Kaplan-Meier curves of progression-free survival according to aggregate diameter changes of irradiated lesions (left) or non-irradiated lesions (right)

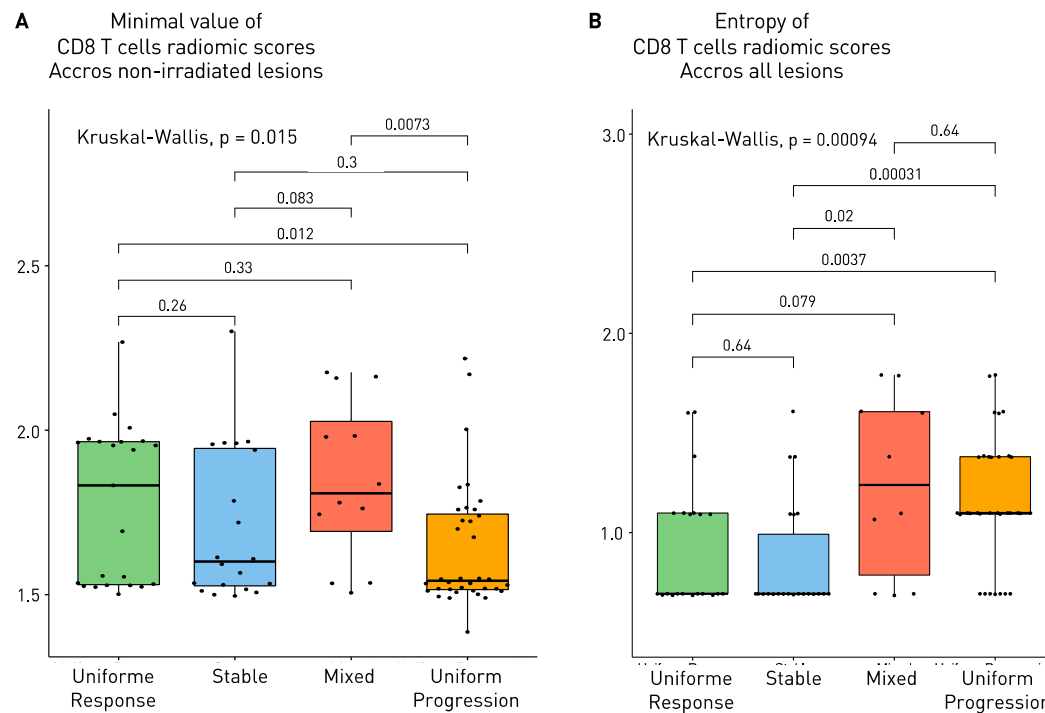

**FIGURE S4.** Association between patterns of response and CD8 T-cells score. A: minimal value of non-irradiated lesions, B: and entropy across all the different lesions.



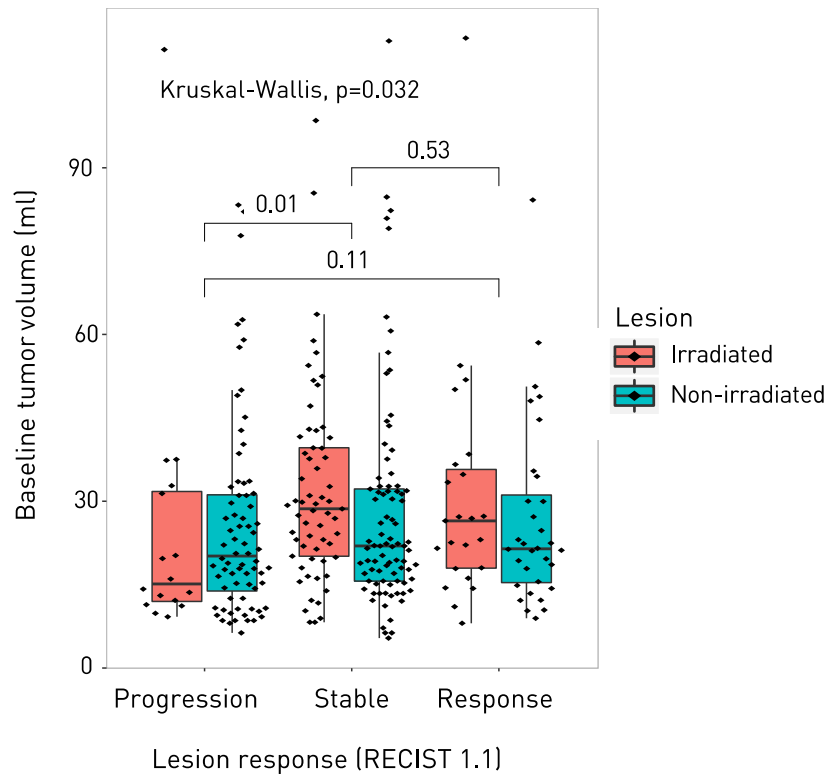

**Figure S5.** Lesion response according to tumour size. Responding lesions corresponded to lesions with a decrease in tumor size > 30% (partial response and complete response).
